# Supplementary material for: A20 Overexpression Inhibits Lipopolysaccharide-Induced NF-κB Activation, TRAF6 and CD40 Expression in Rat Peritoneal Mesothelial Cells
Source: MDPI journal article supplement (doi:10.3390/ijms15046592), 2014-04-17

# Supplementary Information

**Figure S1.** Cells exhibited a polygonal, cobble-stone epithelioid morphology typical of peritoneal mesothelial cells (PMCs) (A); These cells were cytokeratin-positive and failed to express factor VIII (B).

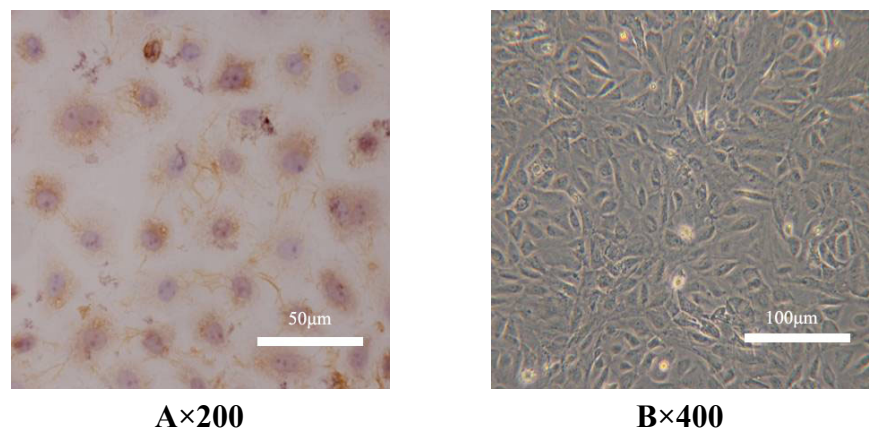

**Figure S2.** A part of DNA sequencing result of the full length *A20* gene in the recombined expression plasmid.

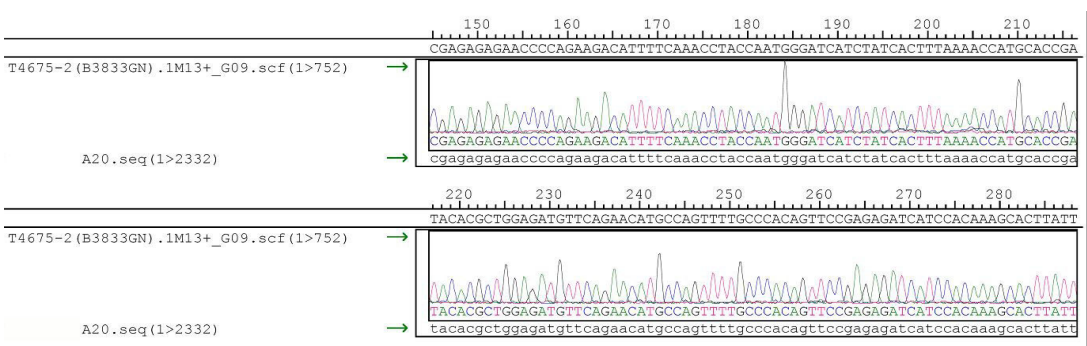

Supplement: s1 [file s1]
